# Supplementary material for: HIV Is Associated with Modified Humoral Immune Responses in the Setting of HIV/TB Coinfection
Source: PubMed Central journal article supplement (PMC7380575; doi:10.1128/msphere.00104-20), 2020-05-20

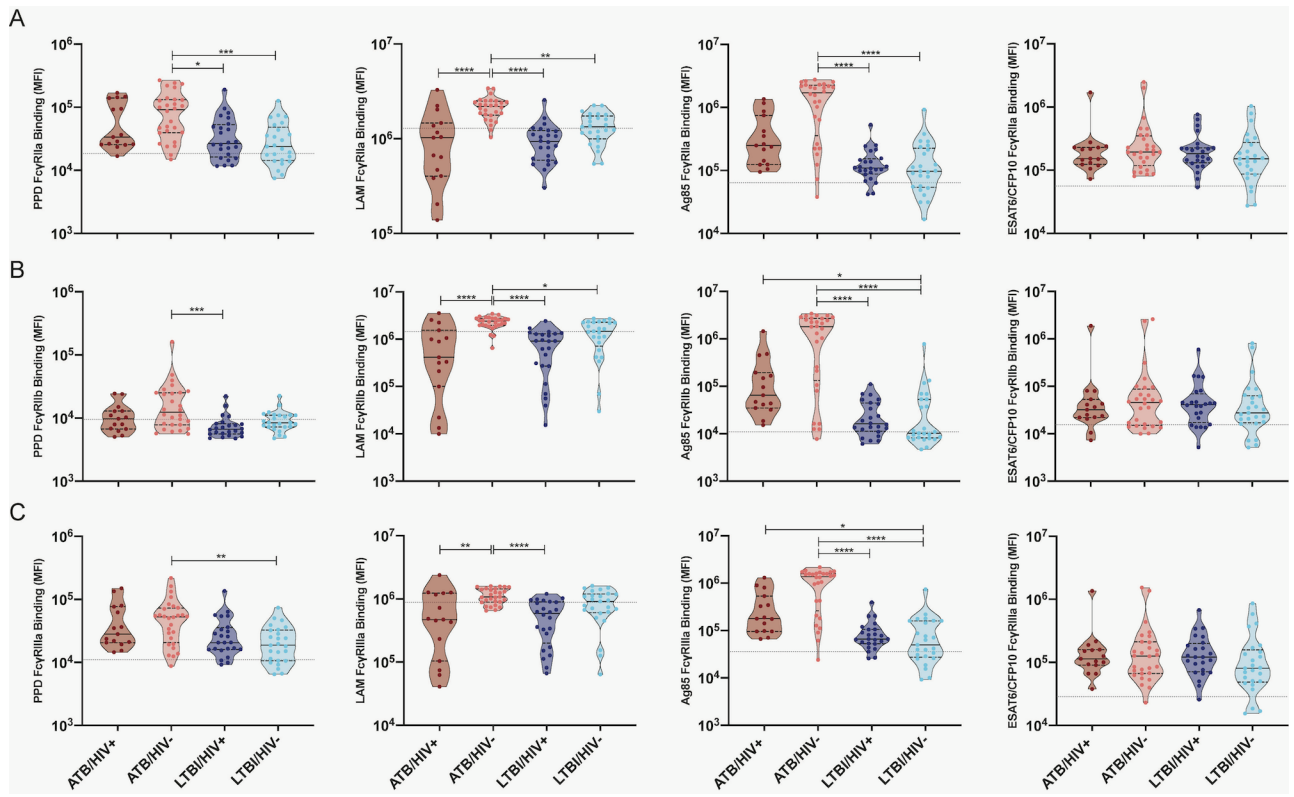

Supplement: mSphere.00104-20-sf003.pdf [file mSphere.00104-20-sf003.pdf]
