# Supplementary material for: HIV Is Associated with Modified Humoral Immune Responses in the Setting of HIV/TB Coinfection
Source: PubMed Central journal article supplement (PMC7380575; doi:10.1128/msphere.00104-20), 2020-05-20
Supplement: mSphere.00104-20-st001.pdf [file mSphere.00104-20-st001.pdf]

| <b>Feature</b>        | <b>p-value</b> | <b>q-value</b> |
|-----------------------|----------------|----------------|
| viral load            | 0.0294         | 0.8873         |
| ESAT6.CFP10.IgG4      | 0.0677         | 0.8873         |
| LAM.total.IgG         | 0.1116         | 0.8873         |
| PPD.IgA1              | 0.2159         | 0.8873         |
| ESAT6.CFP10.IgM       | 0.2159         | 0.8873         |
| Ag85.IgM              | 0.2629         | 0.8873         |
| PPD.IgG2              | 0.3165         | 0.8873         |
| PPD.IgA2              | 0.3165         | 0.8873         |
| ESAT6.CFP10.IgA1      | 0.3768         | 0.8873         |
| LAM.IgG3              | 0.3768         | 0.8873         |
| CD4_count             | 0.3785         | 0.8873         |
| PPD.IgG4              | 0.4437         | 0.8873         |
| PPD.IgM               | 0.4437         | 0.8873         |
| Ag85.IgG2             | 0.4437         | 0.8873         |
| Ag85.IgG4             | 0.4437         | 0.8873         |
| Ag85.IgA1             | 0.4437         | 0.8873         |
| LAM.IgG1              | 0.4437         | 0.8873         |
| ESAT6.CFP10.IgA2      | 0.5169         | 0.9763         |
| Ag85.total.IgG        | 0.5959         | 1.0000         |
| LAM.IgG2              | 0.5959         | 1.0000         |
| Ag85.IgG3             | 0.6800         | 1.0000         |
| LAM.IgA2              | 0.6800         | 1.0000         |
| ESAT6.CFP10.IgG1      | 0.7683         | 1.0000         |
| PPD.IgG1              | 0.8597         | 1.0000         |
| Ag85.IgA2             | 0.8597         | 1.0000         |
| ESAT6.CFP10.IgG3      | 0.8597         | 1.0000         |
| PPD.total.IgG         | 0.9530         | 1.0000         |
| PPD.IgG3              | 0.9530         | 1.0000         |
| Ag85.IgG1             | 0.9530         | 1.0000         |
| ESAT6.CFP10.IgG2      | 0.9530         | 1.0000         |
| LAM.IgM               | 0.9530         | 1.0000         |
| ESAT6.CFP10.total.IgG | 1.0000         | 1.0000         |
| LAM.IgG4              | 1.0000         | 1.0000         |
| LAM.IgA1              | 1.0000         | 1.0000         |
